# Supplementary material
Source: publisher figshare collection journal article supplement (https://diabetesjournals.figshare.com/articles/dataset/_/19383830)

A)

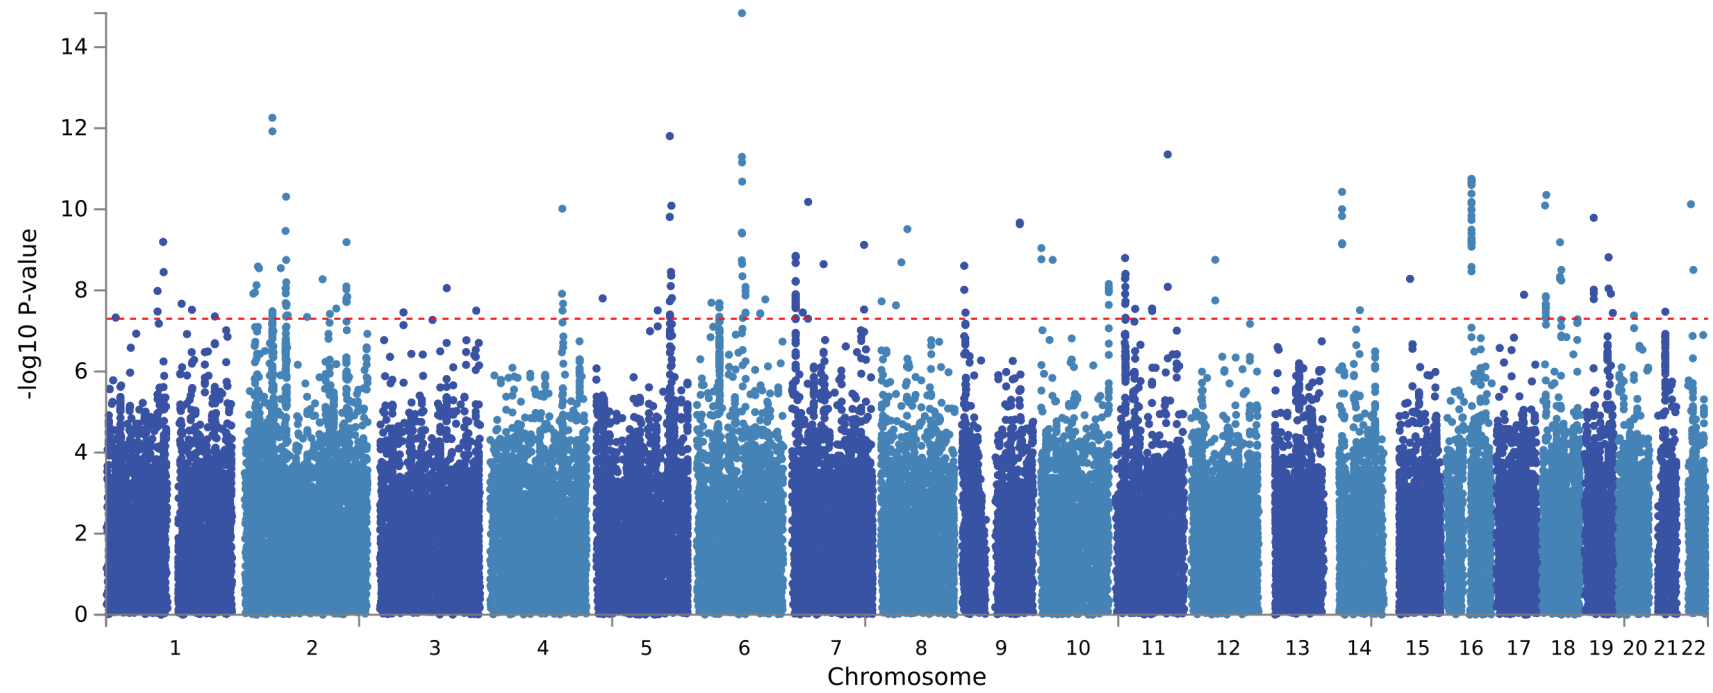

B)

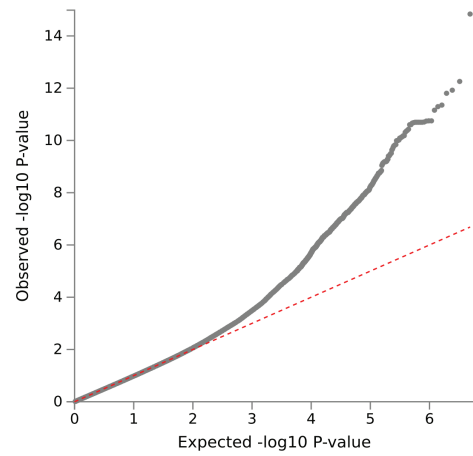

C)

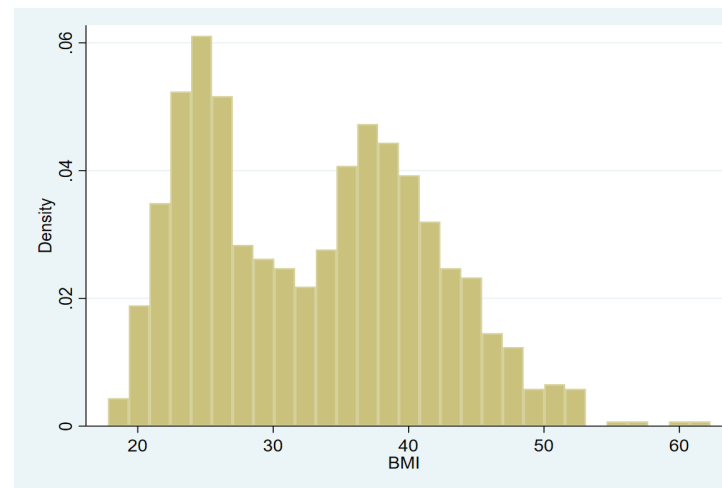

D)

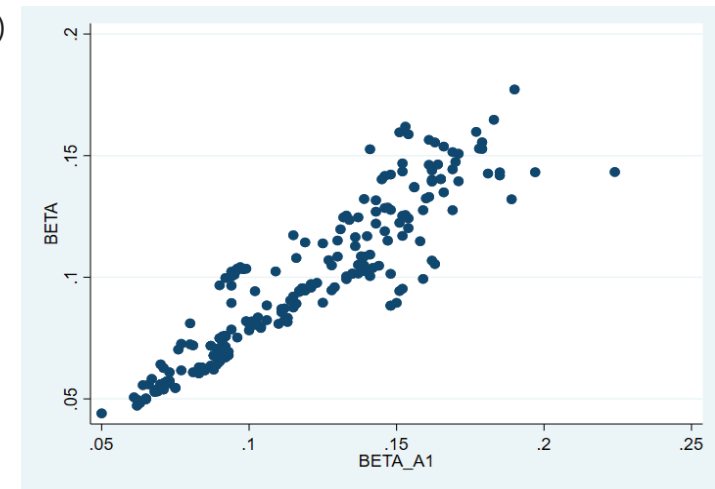

Supplement: Supplementary file 1 [file 1]

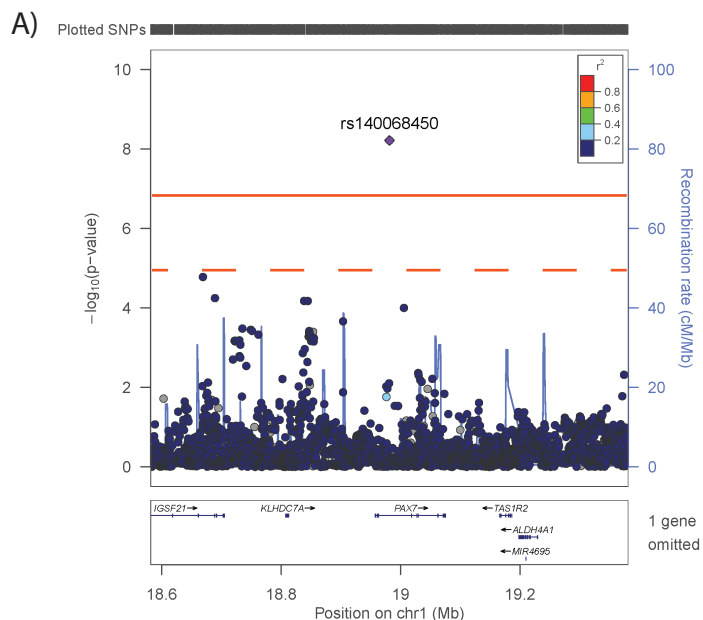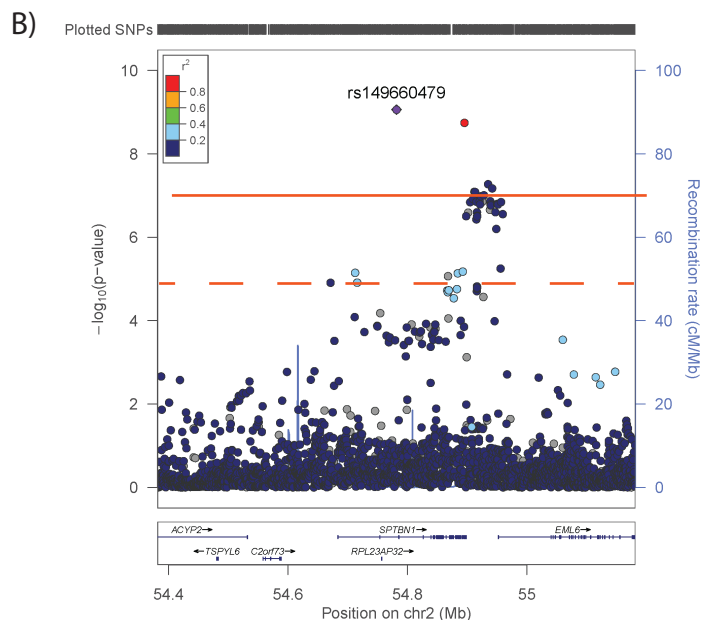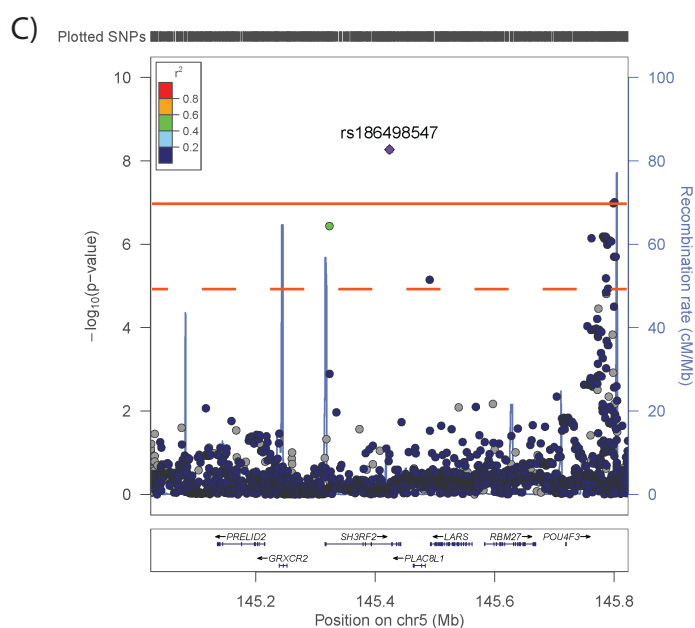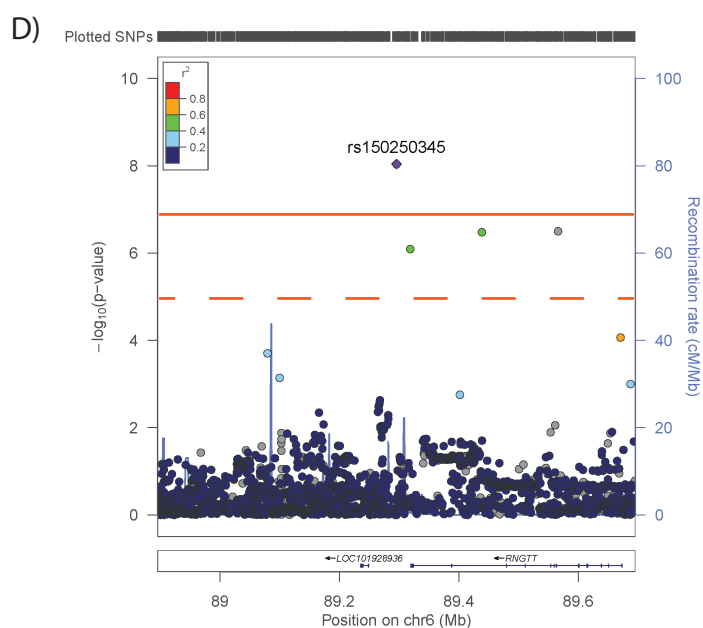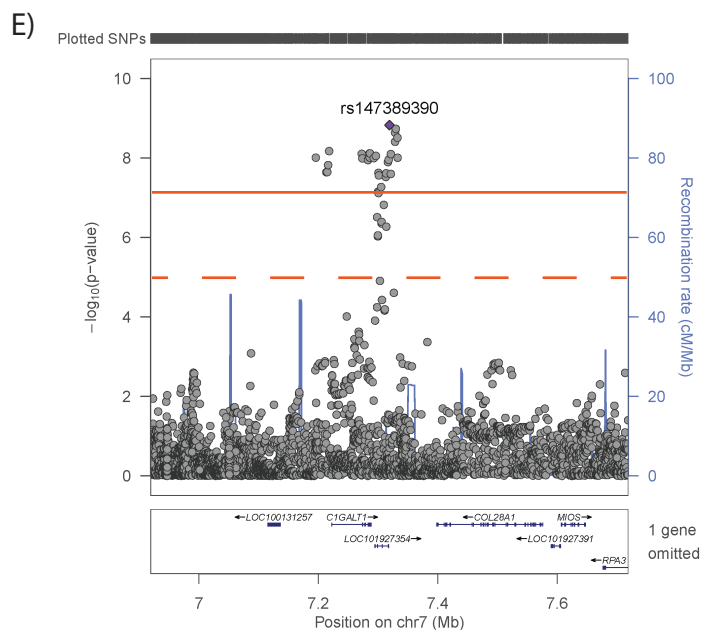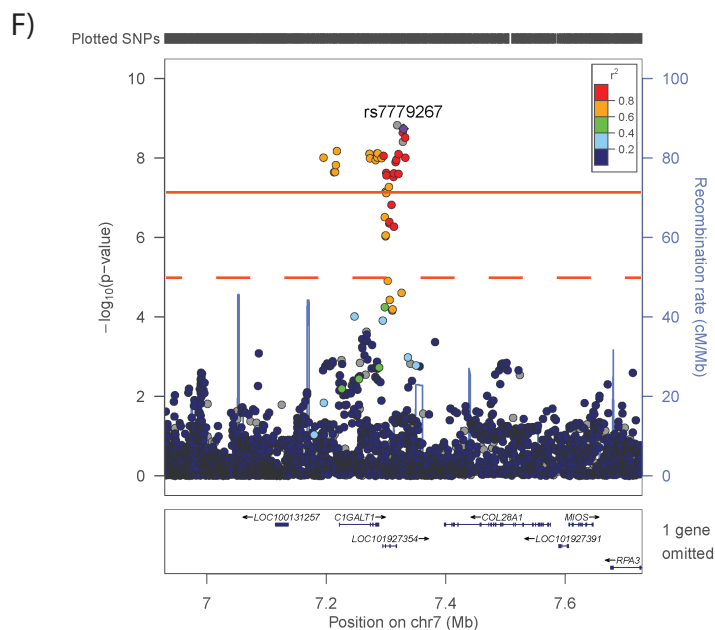

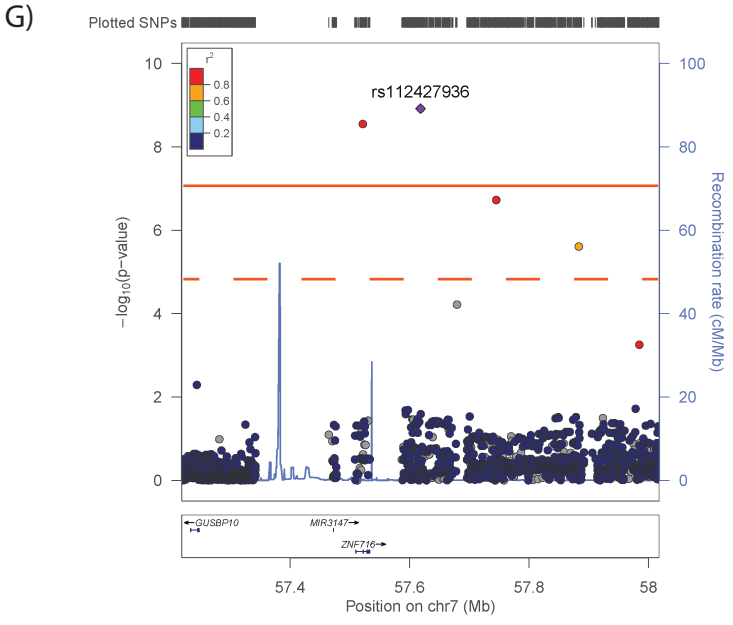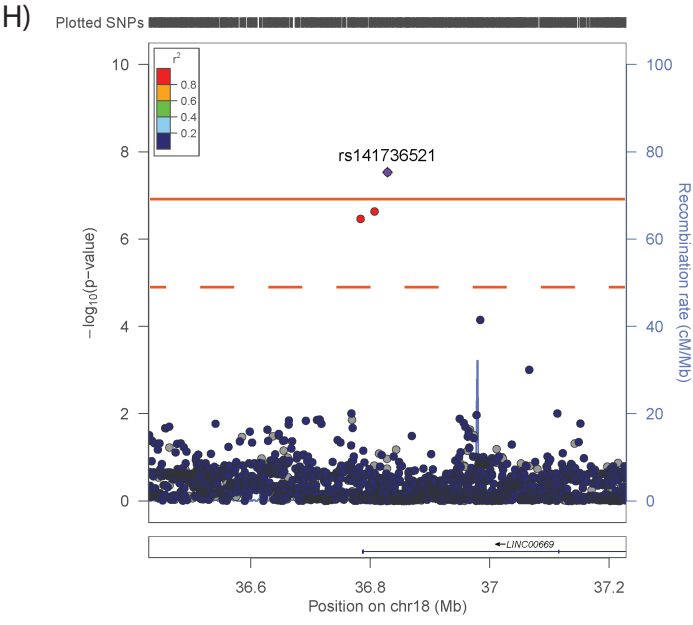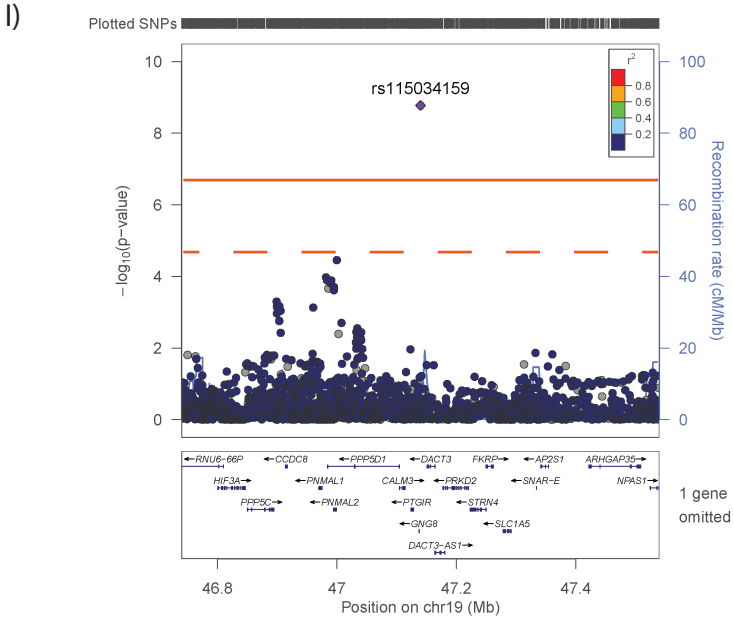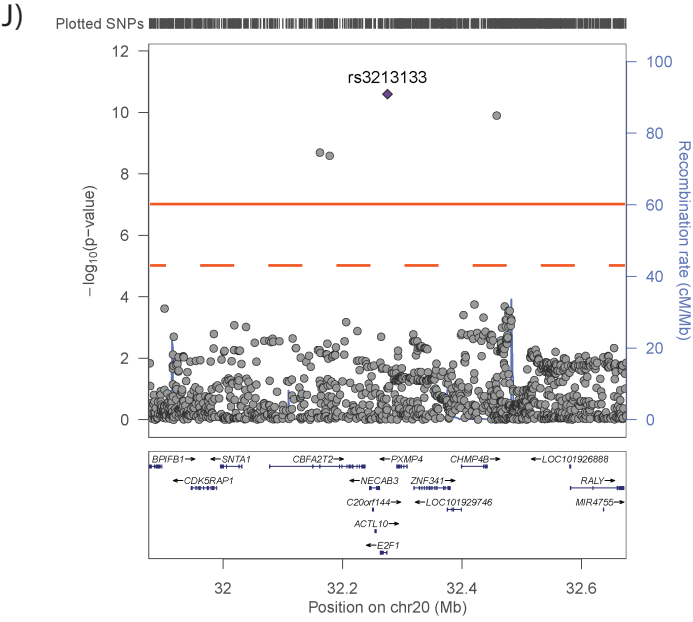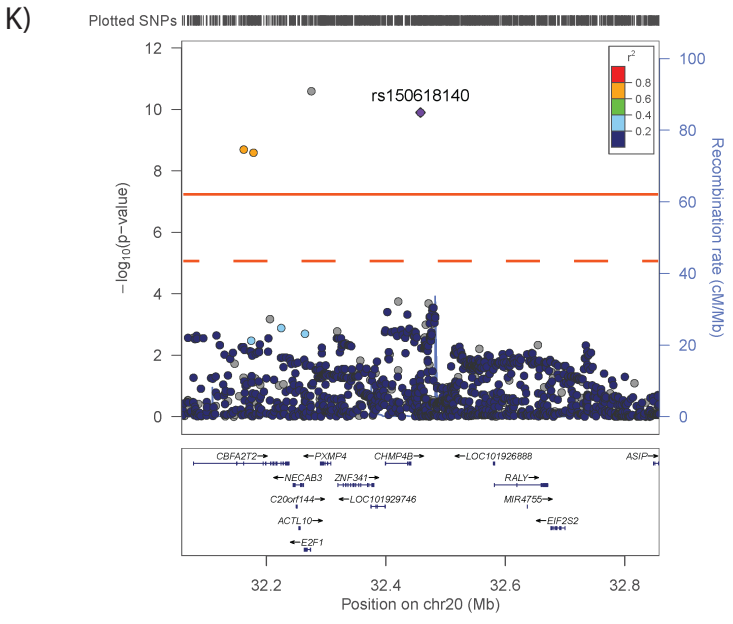

Supplement: Supplementary file 2 [file 1]
